# Supplementary material for: ADAM17 Is an Essential Factor for the Infection of Bovine Cells with Pestiviruses
Source: MDPI journal article supplement (doi:10.3390/v14020381), 2022-02-13
Supplement: s1 [file s1]

# ADAM17 is an Essential Factor for the Infection of Bovine Cells with Pestiviruses

Marianne Zaruba <sup>1</sup>, Hann-Wei Chen <sup>1</sup>, Ole Frithjof Pietsch <sup>1</sup>, Kati Szakmary-Braendle <sup>1</sup>, Angelika Auer <sup>1</sup>,  
Marlene Mötz <sup>1</sup>, Kerstin Seitz <sup>1</sup>, Stefan Düsterhöft <sup>2</sup>, Aspen M. Workman <sup>3</sup>, Till Rümenapf <sup>1</sup>  
and Christiane Riedel <sup>1,\*</sup>

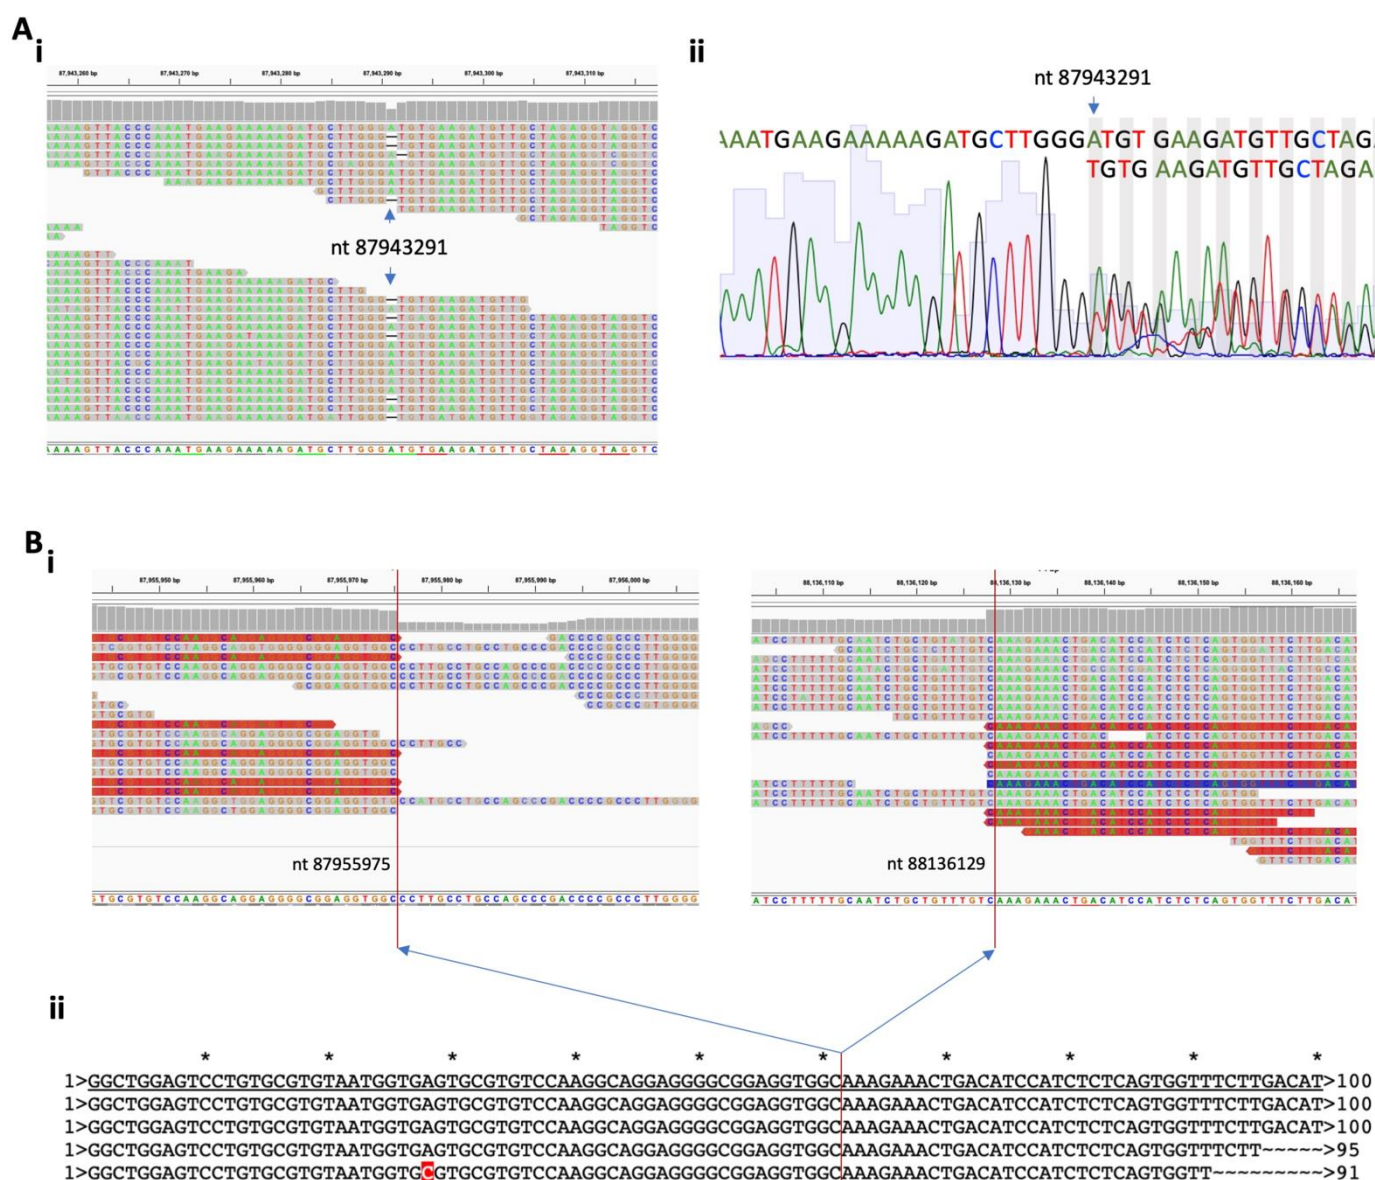

**Figure S1.** Modifications in the *ADAM17* gene. **(A)** (i) Alignment of the reads in the vicinity of the deletion of the nucleotide at position 87943291 and (ii) sequencing chromatogram of a PCR amplicon of exon 8 of the *ADAM17* gene demonstrating the deletion at position 87943291 on one allele. **(B)** (i) Alignments of the reads at the beginning and the end of the large deletion. (ii) Alignment of reads covering the gap caused by the large deletion.

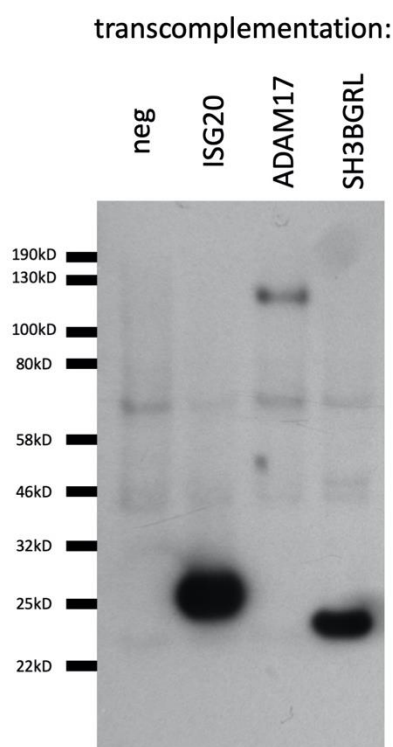

**Figure S2.** Detection of ADAM17 and SH3BGRL expression in lysates of HEK293 cells upon trans-complementation by Western blot analysis employing an anti-flag monoclonal antibody. Neg = negative control.

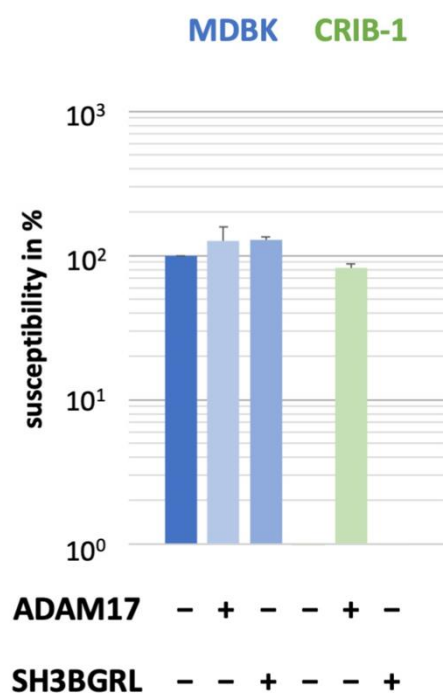

**Figure S3.** Susceptibility of MDBK and CRIB-1 cells expressing bovine ADAM17 or SH3BGRL to a BVDV clone labeled with a fluorophore at the N-terminus of E2. Shown are the average and the standard deviation of three independent experiments.

**Table S1.** List of primers and probes employed in this study.

| Name                   | Sequence                            | Purpose                                            |
|------------------------|-------------------------------------|----------------------------------------------------|
| 3' ADAM17 RT rev       | GTCCAGGAAGTCAGCCCGGTATG             | reverse transcription of ADAM17 mRNA               |
| 5' ADAM17 for          | GACCATGAGGCACCGTGTCTC               | Amplification of ADAM17 cDNA                       |
| 3' ADAM17 rev          | CGGTATGCGGCTGGGACTA                 |                                                    |
| 5' ADAM17 for cloning  | CTGCCACCATGAGGCACCGTGTCTCTTGC       | Amplification of ADAM17 cDNA for cloning           |
| 3' ADAM17 rev cloning  | GTCTTTGTAATCGCACTCGGTCCTTGCTGTC     |                                                    |
| 5' ADAM17 rev cloning  | CACGGTGCCTCATGGTGGCAGCGCTCTAGAAC    | Amplification of vector for integration of ADAM17  |
| 3' ADAM17 for cloning  | CAAGGAGACCGAGTGCATTACAAAGAC-GATGACG |                                                    |
| ADAM17 for qPCR        | GACCAGGGAGGGAAGTATGTCATG            | Quantification of ADAM17                           |
| ADAM17 rev qPCR        | CTGGAAACACTCCTGGGACTTGC             |                                                    |
| SH3BGRL for qPCR       | CCAAGATGGTGATCCGTGTGTA              | Quantification of SH3BGRL                          |
| SH3BGRL rev qPCR       | GGTATCCTGTGGCTGGTCGA                |                                                    |
| 5' SH3BGRL for cloning | GCTGCCACCATGGTGATCCGTGTGTATATTGC    | Amplification of SH3BGRL cDNA for cloning          |
| 3' SH3BGRL rev cloning | GTCTTTGTAATCTGCTTGCTGCTTTGCCTGAGC   |                                                    |
| 3' SH3BGRL for cloning | GCAAAGCAGCAAGCAGATTACAAAGAC-GATGACG | Amplification of vector for integration of SH3BGRL |
| 5' SH3BGRL rev cloning | CACGGATCACCATGGTGGCAGCGCTCTAGAAC    |                                                    |
| actin for              | CAGCACAATGAAGATCAAGATCATC           | Quantification of beta actin                       |
